# Supplementary material for: Assessing the response of soil carbon in Australia to changing inputs and climate using a consistent modelling framework
Source: Copernicus journal article supplement (doi:10.5194/bg-18-5185-2021), 2021-09-22
Supplement: Supplementary file 1 [file bg-18-5185-2021-supplement.pdf]

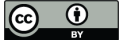

*Supplement of*

## **Assessing the response of soil carbon in Australia to changing inputs and climate using a consistent modelling framework**

**Juhwan Lee et al.**

*Correspondence to:* Raphael A. Viscarra Rossel ([r.viscarra-rossel@curtin.edu.au](mailto:r.viscarra-rossel@curtin.edu.au))

The copyright of individual parts of the supplement might differ from the article licence.

**Table S1.** Sensitivities of total, particulate and mineral-associated organic C (TOC, POC and MAOC) stocks to changes in the allocation of C inputs into the decomposable plant material (DPM) and resistant plant material (RPM) components. The amount of C inputs to the soil and soil organic C stocks were simulated by assuming soil C equilibrium. The estimates of soil organic C were the area weighted averages of the medians for the following land uses across Australia: cropping, modified grazing, native grazing and natural environments. The amount of C input, soil organic C stocks, and their interquartile range and root mean squared error (RMSE) are reported in Mg C ha<sup>-1</sup>.

| DPM/RPM   | n    | C input |       |       | TOC    |       |       |                       |       | POC    |       |       |                       |      | MAOC   |       |       |                       |       |
|-----------|------|---------|-------|-------|--------|-------|-------|-----------------------|-------|--------|-------|-------|-----------------------|------|--------|-------|-------|-----------------------|-------|
|           |      | Median  | 1st Q | 3rd Q | Median | 1st Q | 3rd Q | <i>r</i> <sup>2</sup> | RMSE  | Median | 1st Q | 3rd Q | <i>r</i> <sup>2</sup> | RMSE | Median | 1st Q | 3rd Q | <i>r</i> <sup>2</sup> | RMSE  |
| Measured  | 4431 |         |       |       | 26.69  | 20.48 | 37.54 |                       |       | 3.54   | 2.18  | 5.81  |                       |      | 16.65  | 12.69 | 22.60 |                       |       |
| Simulated |      |         |       |       |        |       |       |                       |       |        |       |       |                       |      |        |       |       |                       |       |
| 0.67      | 4417 | 1.47    | 0.93  | 2.36  | 25.89  | 19.26 | 35.26 | 0.88                  | 9.82  | 5.95   | 4.05  | 8.47  | 0.77                  | 4.98 | 13.08  | 9.38  | 17.60 | 0.69                  | 8.28  |
| 0.96      | 4417 | 1.55    | 0.99  | 2.54  | 25.89  | 19.44 | 35.69 | 0.89                  | 9.84  | 5.49   | 3.86  | 7.76  | 0.77                  | 4.77 | 13.60  | 9.83  | 18.20 | 0.68                  | 8.26  |
| 1.17      | 4417 | 1.63    | 1.04  | 2.60  | 25.83  | 19.48 | 36.15 | 0.88                  | 10.08 | 5.15   | 3.69  | 7.42  | 0.76                  | 4.75 | 13.85  | 10.13 | 18.80 | 0.68                  | 8.46  |
| 1.44      | 4417 | 1.71    | 1.08  | 2.72  | 26.00  | 19.44 | 36.57 | 0.87                  | 10.59 | 4.83   | 3.49  | 6.97  | 0.74                  | 4.84 | 14.17  | 10.46 | 19.62 | 0.66                  | 8.93  |
| 1.78      | 4419 | 1.77    | 1.14  | 2.83  | 26.16  | 19.55 | 36.54 | 0.86                  | 11.42 | 4.46   | 3.22  | 6.41  | 0.72                  | 5.03 | 14.67  | 10.94 | 20.13 | 0.64                  | 9.71  |
| 2.23      | 4419 | 1.83    | 1.20  | 2.98  | 26.10  | 19.53 | 36.55 | 0.83                  | 12.72 | 4.10   | 2.95  | 5.76  | 0.68                  | 5.34 | 15.07  | 11.35 | 20.63 | 0.60                  | 10.94 |
